# Supplementary material for: Analysis of Schistosoma mansoni Extracellular Vesicles Surface Glycans Reveals Potential Immune Evasion Mechanism and New Insights on Their Origins of Biogenesis
Source: MDPI journal article supplement (doi:10.3390/pathogens10111401), 2021-10-29
Supplement: s1 [file s1]

| No | Lectin      | Organism                         | Common name                     | Specificity                                                            |
|----|-------------|----------------------------------|---------------------------------|------------------------------------------------------------------------|
| 1  | AIA Jacalin | <i>Artocarpus intergrifolia</i>  | Jack fruit lectin               | Gal (sialylation tolerant)                                             |
| 2  | RPbAI       | <i>Robinia pseudoacacia</i>      | Black locust lectin             | Gal, GalNAc                                                            |
| 3  | SNA-II      | <i>Sambucus nigra</i>            | Sambucus lectin-II              | Gal/GalNAc                                                             |
| 4  | SJA         | <i>Sophora japonica</i>          | Pagoda tree lectin              | $\beta$ -GalNAc                                                        |
| 5  | DBA         | <i>Dolichos biflorus</i>         | Horse gram lectin               | GalNAc                                                                 |
| 6  | GHA         | <i>Glechoma hederacea</i>        | Ground ivy lectin               | GalNAc                                                                 |
| 7  | SBA         | <i>Glycine max</i>               | Soy bean lectin                 | GalNAc                                                                 |
| 8  | VVA         | <i>Vicia villosa</i>             | Hairy vetch lectin              | GalNAc                                                                 |
| 9  | BPA         | <i>Bauhinia purpurea</i>         | Camel's foot tree lectin        | GalNAc/Gal                                                             |
| 10 | WFA         | <i>Wisteria floribunda</i>       | Japanese wisteria lectin        | GalNAc/sulfated GalNAc                                                 |
| 11 | HPA         | <i>Helix pomatia</i>             | Garden snail lectin             | $\alpha$ -GalNAc                                                       |
| 12 | GSL-I-A4    | <i>Griffonia simplicifolia</i>   | Griffonia lectin-I A4           | GalNAc                                                                 |
| 13 | ACA         | <i>Amaranthus caudatus</i>       | Amaranthin                      | Sialylated/Gal- $\beta$ -(1,3)-GalNAc                                  |
| 14 | ABL         | <i>Agaricus bisporus</i>         | Edible mushroom lectin          | Gal- $\beta$ -(1,3)-GalNAc, GlcNAc                                     |
| 15 | PNA         | <i>Arachis hypogaea</i>          | Peanut lectin                   | Gal- $\beta$ -(1,3)-GalNAc                                             |
| 16 | GSL-II      | <i>Griffonia simplicifolia</i>   | Griffonia /Bandeiraea lectin-II | GlcNAc                                                                 |
| 17 | sWGA        | <i>Triticum vulgaris</i>         | Succinyl WGA                    | GlcNAc                                                                 |
| 18 | DSA         | <i>Datura stramonium</i>         | Jimson weed lectin              | GlcNAc                                                                 |
| 19 | STA         | <i>Solanum tuberosum</i>         | Potato lectin                   | GlcNAc oligomers                                                       |
| 20 | LEL         | <i>Lycopersicon esculentum</i>   | Tomato lectin                   | GlcNAc- $\beta$ -(1,4)-GlcNAc                                          |
| 21 | Calsepa     | <i>Calystegia sepium</i>         | Bindweed lectin                 | Man/Maltose                                                            |
| 22 | NPA         | <i>Narcissus pseudonarcissus</i> | Daffodil lectin                 | $\alpha$ -(1,6)-Man                                                    |
| 23 | GNA         | <i>Galanthus nivalis</i>         | Snowdrop lectin                 | Man- $\alpha$ (1,3)-                                                   |
| 24 | HHA         | <i>Hippeastrum hybrid</i>        | Amaryllis agglutinin            | Man- $\alpha$ (1,3)-Man- $\alpha$ (1,6)-                               |
| 25 | ConA        | <i>Canavalia ensiformis</i>      | Jack bean lectin                | Man, Glc, GlcNAc                                                       |
| 26 | Lch-B       | <i>Lens Culinaris</i>            | Lentil isolectin B              | Man, fucose dependent                                                  |
| 27 | Lch-A       | <i>Lens Culinaris</i>            | Lentil isolectin A              | Man, fucose dependent                                                  |
| 28 | PSA         | <i>Pisum sativum</i>             | Pea lectin                      | Man, fucose dependent                                                  |
| 29 | TJA-I       | <i>Trichosanthes japonica</i>    | TJA One                         | Sialic acid- $\alpha$ -(2,6)-Gal(NAc)                                  |
| 30 | WGA         | <i>Triticum vulgaris</i>         | Wheat germ agglutinin           | NeuAc/GlcNAc                                                           |
| 31 | MAA         | <i>Maackia amurensis</i>         | Maackia agglutinin              | Sialic acid- $\alpha$ -(2,3)-Gal(NAc)                                  |
| 32 | SNA-I       | <i>Sambucus nigra</i>            | Sambucus lectin-II              | Sialic acid- $\alpha$ -(2,6)-Gal(NAc)                                  |
| 33 | CCA         | <i>Cancer antennarius</i>        | California crab                 | 9-O -acetyl-sialic acid                                                |
| 34 | PHA-L       | <i>Phaseolus vulgaris</i>        | Kidney bean leucoagglutinin     | tri-/tetra-antennary $\beta$ -Gal/Gal- $\beta$ -(1,4)-GlcNAc           |
| 35 | PHA-E       | <i>Phaseolus vulgaris</i>        | Kidney bean erythroagglutinin   | biantennary, bisecting GlcNAc, $\beta$ -Gal/Gal- $\beta$ -(1,4)-GlcNAc |
| 36 | RCA-I/120   | <i>Ricinus communis</i>          | Castor bean lectin              | Gal- $\beta$ -(1,4)-GlcNAc                                             |
| 37 | AMA         | <i>Arum maculatum</i>            | Lords and Ladies agglutinin     | Gal- $\beta$ -(1,4)-GlcNAc                                             |
| 38 | CPA         | <i>Cicer arietinum</i>           | Chickpea lectin                 | Complex glycopeptides                                                  |
| 39 | CAA         | <i>Caragana arborescens</i>      | Pea tree lectin                 | Gal- $\beta$ -(1,4)-GlcNAc                                             |
| 40 | ECA         | <i>Erythrina cristagalli</i>     | Cocks comb/coral tree lectin    | Gal- $\beta$ -(1,4)-GlcNAc oligomers                                   |
| 41 | TJA-II      | <i>Trichosanthes japonica</i>    | TJA Two                         | Fuc- $\alpha$ (1,2)Gal(NAc)- $\beta$ (1,4)                             |
| 42 | AAL         | <i>Aleuria aurantia</i>          | Orange peel fungus lectin       | $\alpha$ -(1,6 and 1,3)-linked Fuc                                     |
| 43 | LTA         | <i>Lotus tetragonolobus</i>      | Lotus lectin                    | $\alpha$ -(1,3)-linked Fuc                                             |
| 44 | UEA-I       | <i>Ulex europaeus</i>            | Gorse lectin-I                  | $\alpha$ -(1,2)-linked Fuc                                             |
| 45 | PA-I        | <i>Pseudomonas aeruginosa</i>    | Pseudomonas lectin              | $\alpha$ -Gal, Gal derivatives                                         |
| 46 | EEA         | <i>Euonymus europaeus</i>        | Spindle tree lectin             | $\alpha$ -Gal                                                          |
| 47 | GSL-I-B4    | <i>Griffonia simplicifolia</i>   | Griffonia /Bandeiraea lectin-I  | $\alpha$ -Gal                                                          |
| 48 | MPA         | <i>Maclura pomifera</i>          | Osage orange lectin             | $\alpha$ -Gal                                                          |
| 49 | VRA         | <i>Vigna radiata</i>             | Mung bean lectin                | $\alpha$ -Gal                                                          |
| 50 | MOA         | <i>Marasmius oreades</i>         | Fairy ring mushroom lectin      | $\alpha$ -Gal                                                          |
| 51 | PBS         | N/A                              | N/A                             | N/A                                                                    |
| 52 | BSA         | N/A                              | N/A                             | N/A                                                                    |

**Supplementary Table S1:** Lectin array v2.4.0 print list with coarse specificity information for each lectin.
